# Supplementary material for: What factors affect clinical decision-making about access to stroke rehabilitation? A systematic review
Source: PubMed Central journal article supplement (PMC6348456; doi:10.1177/0269215518808000), 2018-10-29
Supplement: Supplemental_Material.pdf [file Supplemental_Material.pdf]

Supplementary Table 1. Summary of factors influencing decisions

| Studies                                  | Patient related factors |                               |                         |                      |                       |            |                           |                                        | Organisational factors |           | Characteristics of individual clinicians |            |           |          |
|------------------------------------------|-------------------------|-------------------------------|-------------------------|----------------------|-----------------------|------------|---------------------------|----------------------------------------|------------------------|-----------|------------------------------------------|------------|-----------|----------|
|                                          | Age                     | Pre- and post-stroke function | Type/severity of stroke | Presence of dementia | Social/family support | Motivation | Demonstration of progress | Predictions about recovery / discharge | Service pressure       | Insurance | Clinical discipline                      | Experience | Knowledge | Emotions |
| Burton et al. (2015) <sup>21</sup>       |                         |                               | ✓                       | ✓                    |                       | ✓          |                           |                                        | ✓                      |           |                                          |            |           | ✓        |
| Daniëls et al. (2002) <sup>19</sup>      |                         | ✓                             |                         |                      |                       | ✓          | ✓                         |                                        |                        |           |                                          |            |           | ✓        |
| Johnson et al. (2015) <sup>23</sup>      | ✓                       |                               |                         |                      | ✓                     |            |                           |                                        | ✓                      |           |                                          |            | ✓         |          |
| Lam Wai Shun et al. (2017) <sup>22</sup> | ✓                       | ✓                             |                         |                      |                       | ✓          | ✓                         | ✓                                      | ✓                      |           | ✓                                        | ✓          | ✓         | ✓        |
| Longley et al. (2018) <sup>10</sup>      |                         | ✓                             |                         | ✓                    |                       |            | ✓                         | ✓                                      | ✓                      |           | ✓                                        | ✓          | ✓         | ✓        |
| Luker et al. (2014) <sup>14</sup>        | ✓                       | ✓                             | ✓                       |                      | ✓                     | ✓          | ✓                         | ✓                                      | ✓                      |           |                                          | ✓          | ✓         | ✓        |
| Lynch et al. (2017) <sup>16</sup>        |                         |                               |                         | ✓                    | ✓                     |            | ✓                         | ✓                                      |                        |           |                                          |            |           |          |

|                                           |   |   |   |   |   |   |  |   |   |   |   |  |   |  |
|-------------------------------------------|---|---|---|---|---|---|--|---|---|---|---|--|---|--|
| Lynch et al. (2016) <sup>15</sup>         |   |   | ✓ | ✓ |   |   |  |   |   |   |   |  | ✓ |  |
| Hakkennes et al. (2013) <sup>17</sup>     |   | ✓ |   | ✓ | ✓ |   |  |   |   |   |   |  |   |  |
| Hasenbein et al. (2002) <sup>31</sup>     | ✓ |   |   |   |   |   |  |   |   |   | ✓ |  |   |  |
| Kennedy et al. (2012) <sup>18</sup>       | ✓ |   |   |   |   |   |  | ✓ | ✓ |   |   |  |   |  |
| Magdon-Ismail et al. (2016) <sup>24</sup> |   |   |   |   | ✓ |   |  |   | ✓ | ✓ | ✓ |  |   |  |
| Putman et al. (2007) <sup>20</sup>        |   | ✓ |   | ✓ | ✓ | ✓ |  |   |   | ✓ |   |  |   |  |

## Appendix 1

### MEDLINE Search strategy

| Search Order | Search terms incorporating Boolean terminology                | Article yield |
|--------------|---------------------------------------------------------------|---------------|
| S1           | (MH "Stroke") OR (MH "cerebrovascular accident) OR (MH "CVA") | 237,055       |
| S2           | (MH "rehabilitation")                                         | 307,070       |
| S3           | (MH "therapy")                                                | 3,702,752     |
| S4           | S2 OR S3                                                      | 3,909,165     |
| S5           | (MH "Decision making")                                        | 163,768       |
| S6           | (MH "clinical reasoning")                                     | 2,598         |
| S7           | S5 OR S6                                                      | 165,750       |
| S8           | S1 AND S4 AND S7                                              | 1,293         |
